# Supplementary material for: Toxoplasmosis – Awareness and knowledge among medical doctors in Nigeria
Source: PubMed Central journal article supplement (PMC5736225; doi:10.1371/journal.pone.0189709), 2017-12-19
Supplement: pone.0189709.s001.pdf [file pone.0189709.s001.pdf]

**Dear colleague,**

This questionnaire for medical doctors is part of a study on *Toxoplasma gondii* in Nigeria.

We kindly ask you for your time and sincere opinions: please fill in this questionnaire based on your current knowledge, without using any external information sources. By doing so, you give permission to use the answers for research purposes.

We plan to include a summary of the results in an international research publication. The results will be reported so that an individual participant cannot be recognized. The new information gathered will also help to evaluate the needs for continued professional education.

Please **circle** your answers from the options given. You may select several answers for each question.

|                                                  |           |         |                 |
|--------------------------------------------------|-----------|---------|-----------------|
| Sex                                              | Female    | Male    |                 |
| Years of experience in the medical field         | < 5       | 5-10    | >10             |
| <i>Toxoplasma gondii</i> is a                    | Bacterium | Virus   | Parasite        |
|                                                  | Fungi     | Insect  | I am not sure   |
| <i>T. gondii</i> can infect                      | Humans    | Pigs    | Sheep           |
|                                                  | Camels    | Dogs    | Cats            |
|                                                  | Fish      | Chicken | Spiders         |
|                                                  |           |         | I am not sure   |
| <i>T. gondii</i> can be shed in the feces of     | Humans    | Pigs    | Sheep           |
|                                                  | Camels    | Dogs    | Cats            |
|                                                  | Fish      | Chicken | Spiders         |
|                                                  |           |         | I am not sure   |
| <i>T. gondii</i> infections can be meatborne     | Yes       | No      | I am not sure   |
| <i>T. gondii</i> infections can be waterborne    | Yes       | No      | I am not sure   |
| Clinical toxoplasmosis may involve               | CNS       | Fetus   | Red blood cells |
|                                                  | Lungs     | Eyes    | I am not sure   |
| Most <i>T. gondii</i> infections are subclinical | Yes       | No      | I am not sure   |
| <i>T. gondii</i> can cause blindness             | Yes       | No      | I am not sure   |
| I know how and when to treat toxoplasmosis       | Yes       | No      | I am not sure   |
| I have seen a case of clinical toxoplasmosis     | Yes       | No      | I am not sure   |

Please return this sheet back to our designated staff. **Thank you.**

For enquiries, please do not hesitate to contact us: Dr Efunshile [AM-drefunshile@yahoo.com](mailto:AM-drefunshile@yahoo.com)
